# Supplementary material for: The oxygen evolution reaction on cobalt atom embedded nitrogen doped graphene electrocatalysts: a density functional theory study
Source: Royal Society of Chemistry journal article supplement (doi:10.1039/d4cp00542b), 2024-01-01
Supplement: d4cp00542b1.pdf [file d4cp00542b1.pdf]

**Supporting information for**  
**Oxygen evolution reaction on cobalt atoms embedded nitrogen**  
**doped graphene electrocatalysts: a density functional theory**  
**study**

Meijing Liao<sup>a,b,+</sup>, Bing Zhao<sup>a,b,+</sup>, Guangsong Zhang<sup>a,+</sup>, Junhao Peng<sup>a</sup>, Yuexing  
Zhang<sup>a,\*</sup>, Bin Liu<sup>b,\*</sup>, Xinfang Wang<sup>a,\*</sup>

**Contents**

**Computational Details on adsorption Gibbs free energy  $\Delta G_{OH^*}$ ,  $\Delta G_{O^*}$ ,  $\Delta G_{OOH^*}$**

**Figure S1-S8.** PDOS (partial density of state) of (a) Co atoms, (b) N atoms, (c) C atoms, and (d) the total DOS in Coxy-NG.

**Figure S9.** PDOS (partial density of state) of (a) N atoms, (b) C atoms, and (c) the total DOS in NG.

**Figure S10.** Energy band structure profile of (a) Co11-NG, (b) Co21-NG, (c) Co22-NG, (d) Co31-NG, (e) Co32-NG, (f) Co41-NG, (g) Co42-NG, (h) Co43-NG, and (i) NG.

**Figure S11.** The computed free energy profiles and optimized intermediate structure for OER on Coxy-NG ( $x=1-4, y=1-3$ ).

**Figure S12.** Charge differential density (CDD) of the rate determining step (RDS) of Co22-NG and Co43-NG.

Figure S13. The correlation between the adsorption energy of (a)  $\Delta E_{OOH^*}$  vs.  $\Delta E_{O^*}$  and (b)  $\Delta E_{OOH^*}$  vs.  $\Delta E_{OH^*}$  on various Coxy-NG catalysts.

**Table S1.** The Millikan charges (in e) for each Co atom and all N atoms (total charge) of Coxy-NG ( $x=1-4, y=1-3$ ).

**Table S2.** The computed binding energies ( $E_b$ , eV), cohesive energies ( $E_c$ , eV), shortest distances between Co and N atoms ( $d_{Co-N}$ , Å), corresponding descriptor ( $\Delta G_{OH^*}$ ,  $\Delta G_{O^*}$ ,  $\Delta G_{OOH^*}$ , all in eV), the RDS barrier ( $E_{RDS}$ , eV), and overpotential ( $\eta^{OER}$ , V) for Coxy-NG ( $x=1-4; y=1-3$ ).

### Computational Details on adsorption Gibbs free energy $\Delta G_{OH^*}$ , $\Delta G_{O^*}$ , $\Delta G_{OOH^*}$

The  $\Delta G_{O^*}$ ,  $\Delta G_{OH^*}$  and  $\Delta G_{OOH^*}$  are obtained by:

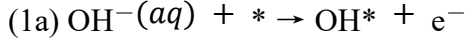

$$\Delta G_1$$

$$= \Delta G_{OH^*} = G_{OH^*} - E_* - G[\text{OH}^-(aq) - e^-] = G_{OH^*} - E_* - G[\text{H}_2\text{O}(l)] - G_{OH^*} - 0.8277 \text{ eV}$$

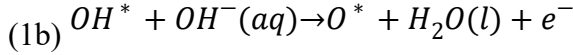

$$\Delta G_2 = G_{O^*} + G[\text{H}_2\text{O}(l)] - G_{OH^*} - G[\text{OH}^-(aq) - e^-] =$$

$$G_{O^*} - G_{OH^*} + 1/2G[\text{H}_2(g)] - 0.8277 \text{ eV}$$

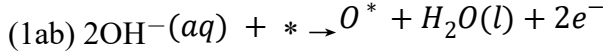

$$\Delta G_{O^*} = \Delta G_1 + \Delta G_2 = G_{O^*} + G[\text{H}_2\text{O}(l)] - E_* - 2 * G[\text{OH}^-(aq) - e^-] =$$

$$G_{O^*} - E_* - G[\text{H}_2\text{O}(l)] + G[\text{H}_2(g)] - 1.6554 \text{ eV}$$

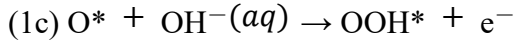

$$\Delta G_3 = G_{OOH^*} - G_{O^*} - G[\text{OH}^-(aq) - e^-]$$

$$= G_{OOH^*} - G_{O^*} - G[\text{H}_2\text{O}(l)] + 1/2G[\text{H}_2(g)] - 0.8277 \text{ eV}$$

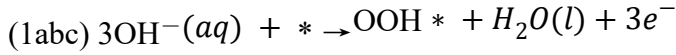

$$\Delta G_{OOH^*}$$

$$= \Delta G_1 + \Delta G_2 + \Delta G_3 = G_{OOH^*} + G[\text{H}_2\text{O}(l)] - E_* - 3 * G[\text{OH}^-(aq) - e^-] = G_{OOH^*} - E_* - 2G[\text{H}_2\text{O}(l)] + 3/2G[\text{H}_2(g)] - 2.4831 \text{ eV}$$

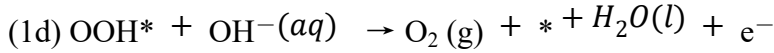

$$\Delta G_4$$

$$= G[\text{O}_2(g)] + G[\text{H}_2\text{O}(l)] + E_* - G_{OOH^*} - G[\text{OH}^-(aq) - e^-] = 2G[\text{H}_2\text{O}(l)] - G[\text{H}_2(g)] + 4.9148 \text{ eV} + G[\text{H}_2\text{O}(l)] + E_* - G_{OOH^*} - G[\text{H}_2\text{O}(l)] + 1/2G[\text{H}_2(g)] - 0.8277 \text{ eV}$$

$$= 2G[\text{H}_2\text{O}(l)] - 3/2G[\text{H}_2(g)] + E_* - G_{OOH^*} + 4.0871 \text{ eV}$$

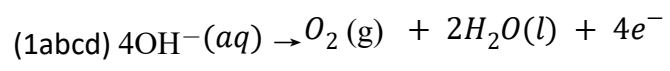

$$\Delta G_{\text{O}_2} = \Delta G_1 + \Delta G_2 + \Delta G_3 + \Delta G_4 = 1.604 \text{ eV}$$

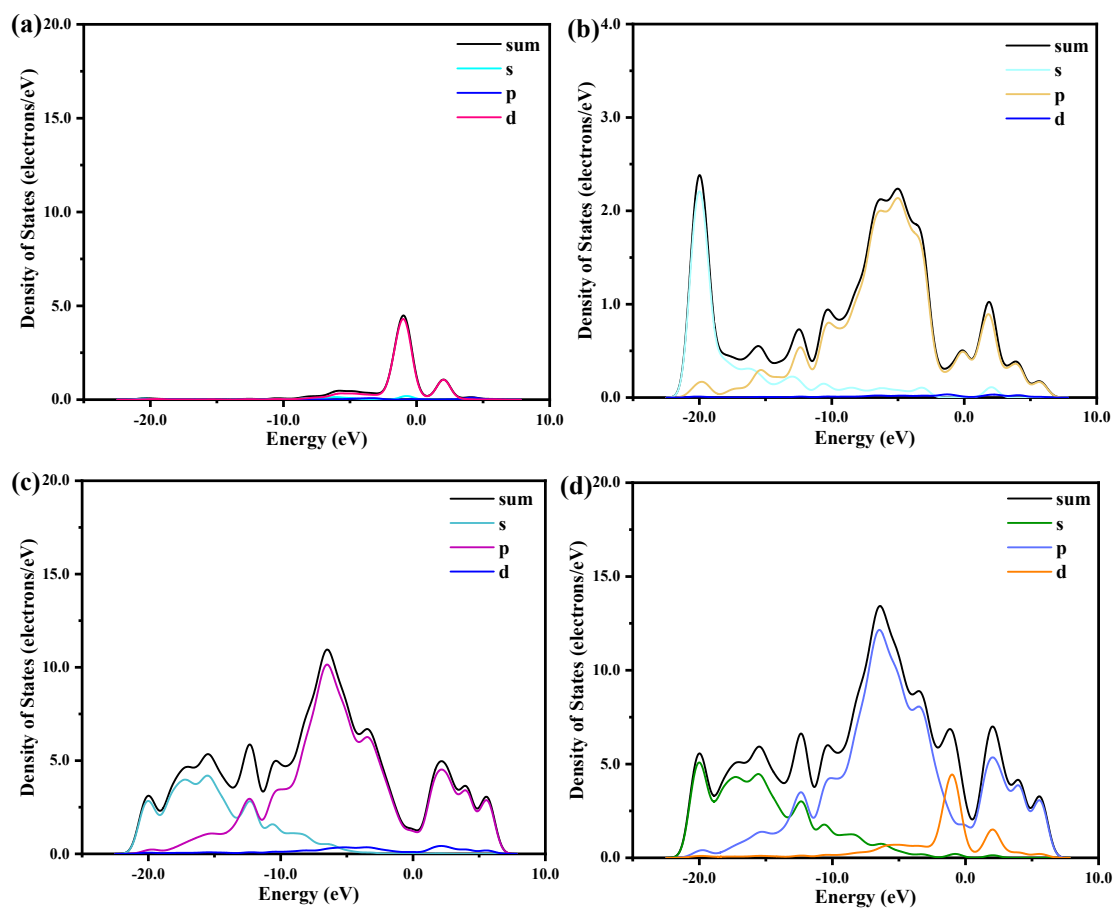

**Figure S1.** PDOS (partial density of state) of (a) Co atoms, (b) N atoms, (c) C atoms, and (d) the total DOS in Co11-NG.

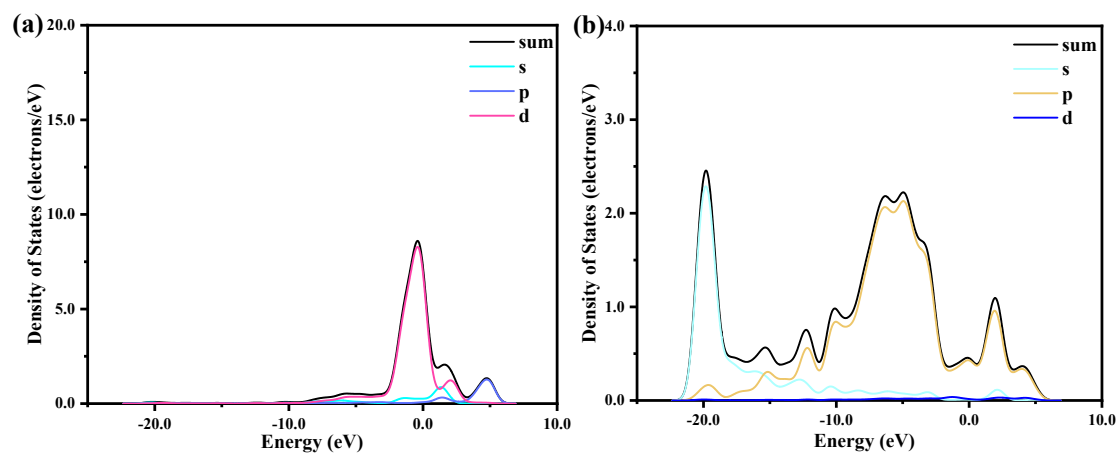

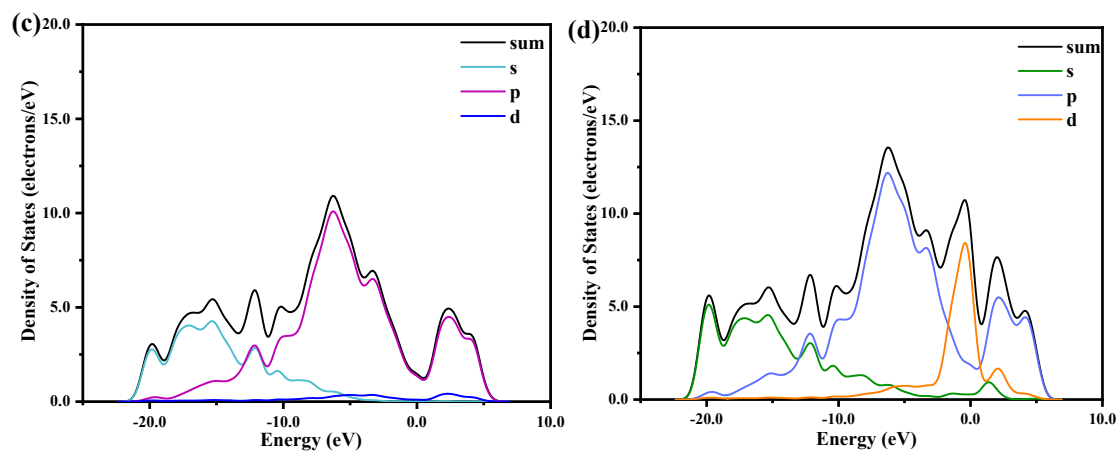

**Figure S2.** PDOS (partial density of state) of (a) Co atoms, (b) N atoms, (c) C atoms, and (d) the total DOS in Co21-NG.

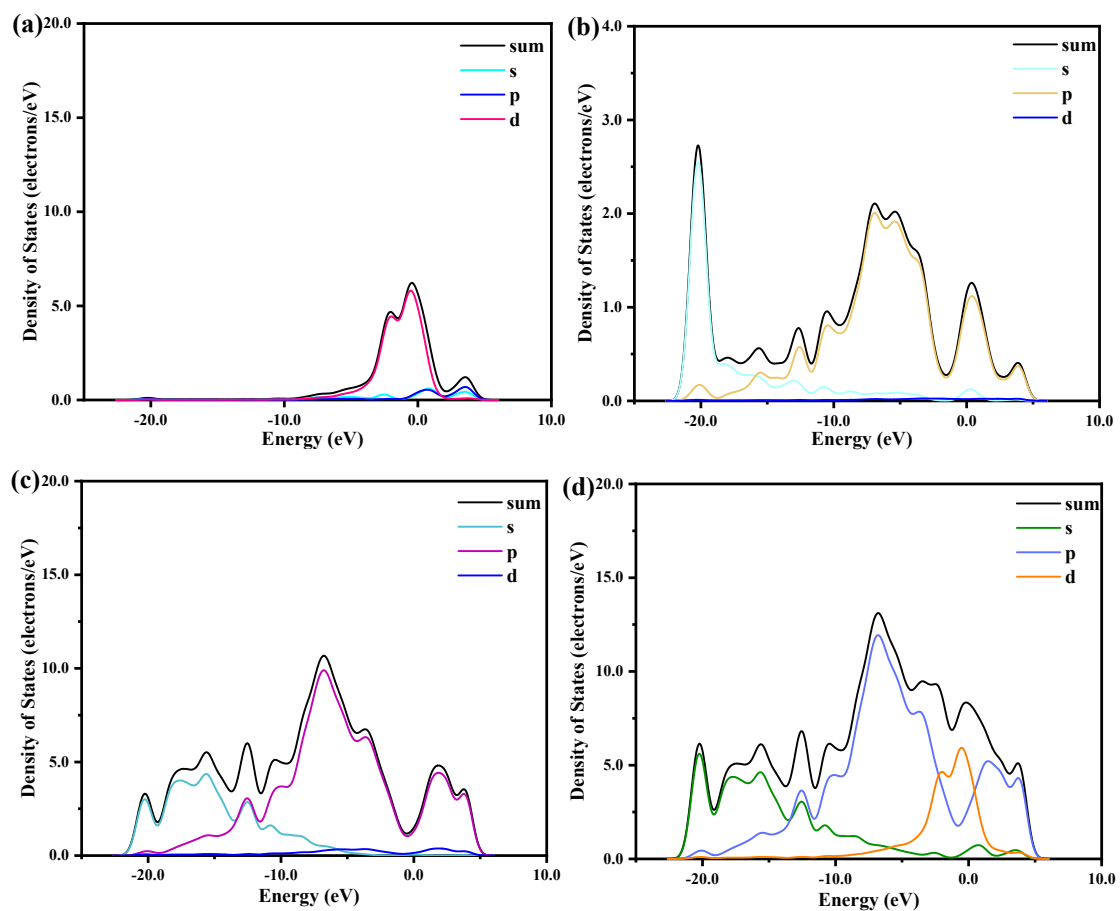

**Figure S3.** PDOS (partial density of state) of (a) Co atoms, (b) N atoms, (c) C atoms,

and (d) the total DOS in Co22-NG.

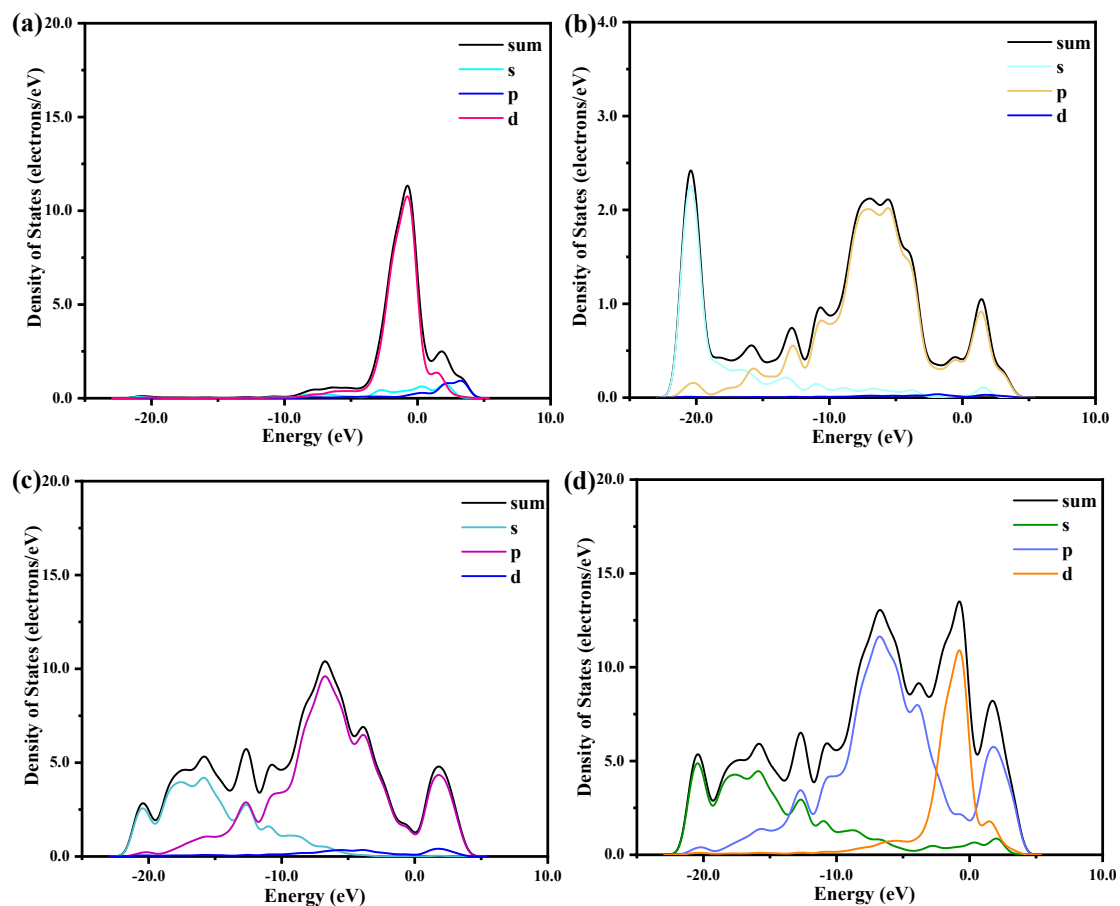

**Figure S4.** PDOS (partial density of state) of (a) Co atoms, (b) N atoms, (c) C atoms, and (d) the total DOS in Co31-NG.

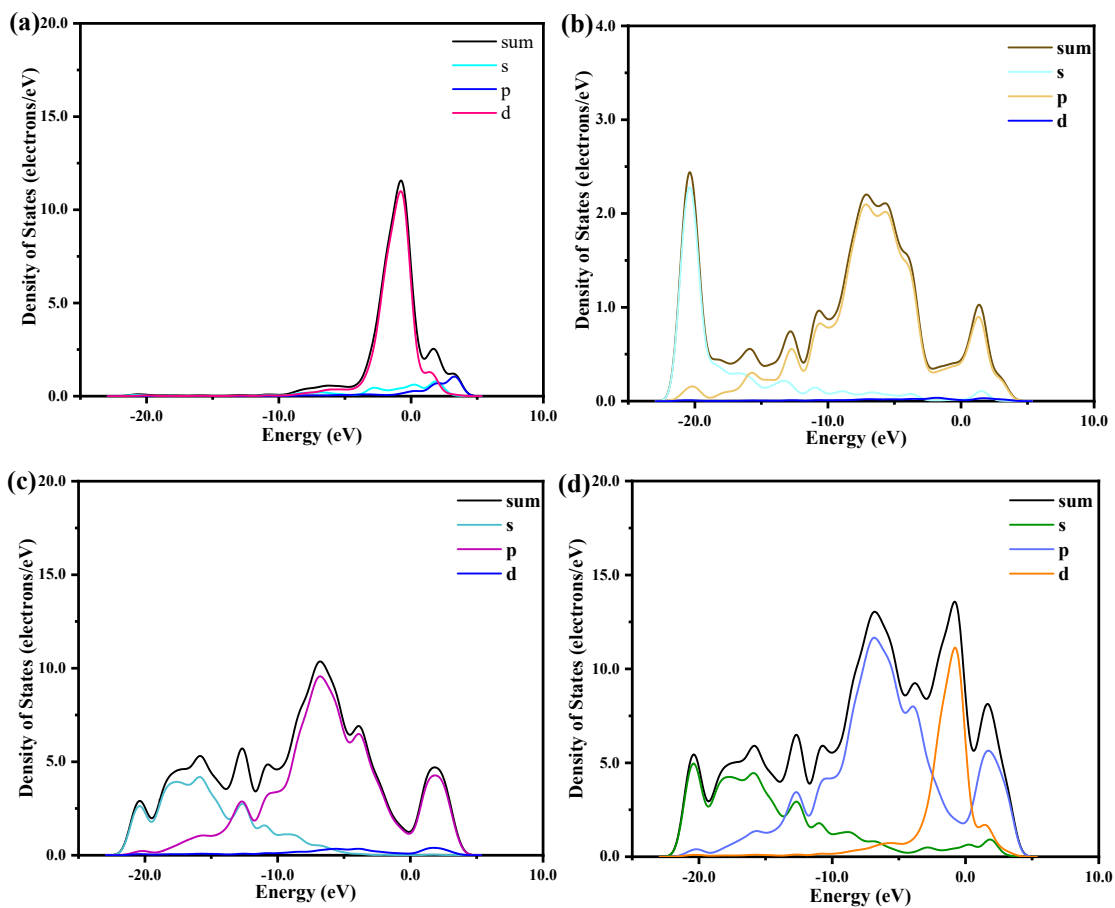

**Figure S5.** PDOS (partial density of state) of (a) Co atoms, (b) N atoms, (c) C atoms, and (d) the total DOS in Co<sub>32</sub>-NG.

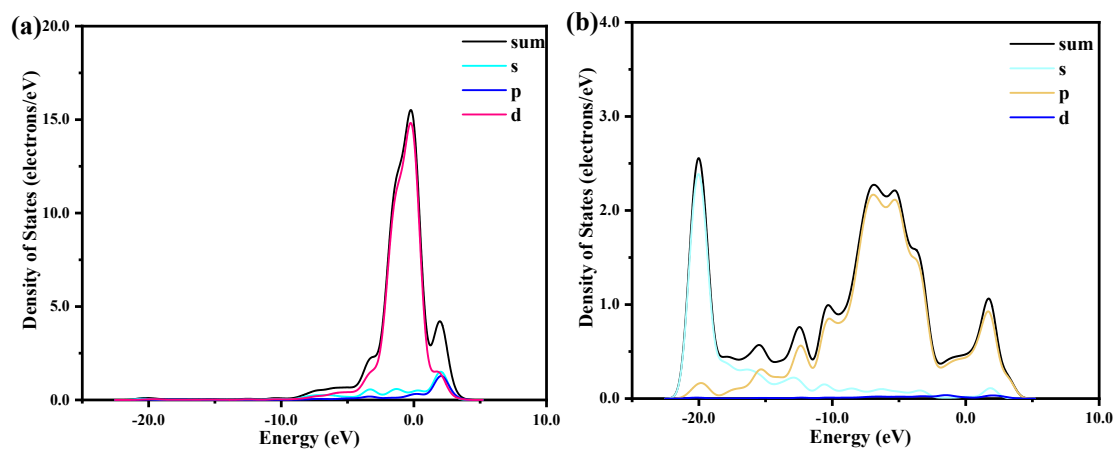

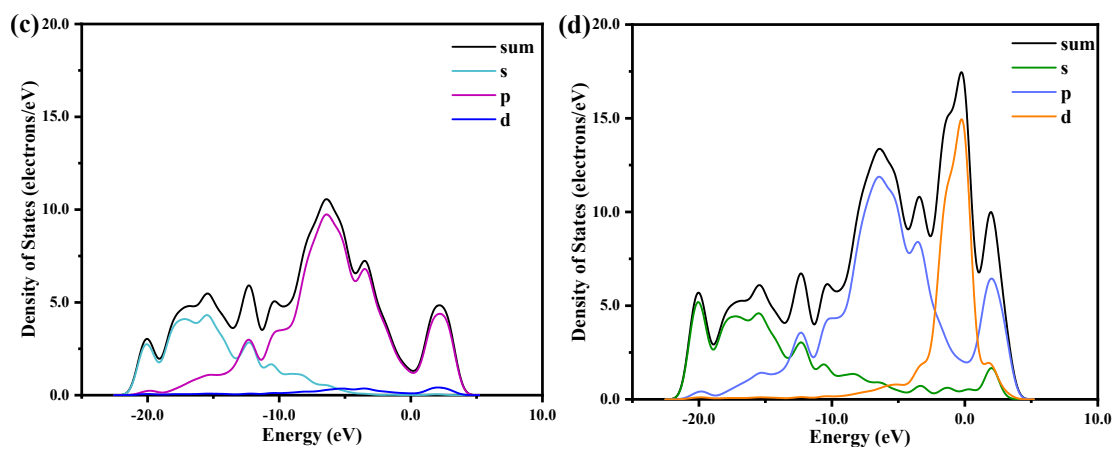

**Figure S6.** PDOS (partial density of state) of (a) Co atoms, (b) N atoms, (c) C atoms, and (d) the total DOS in Co41-NG.



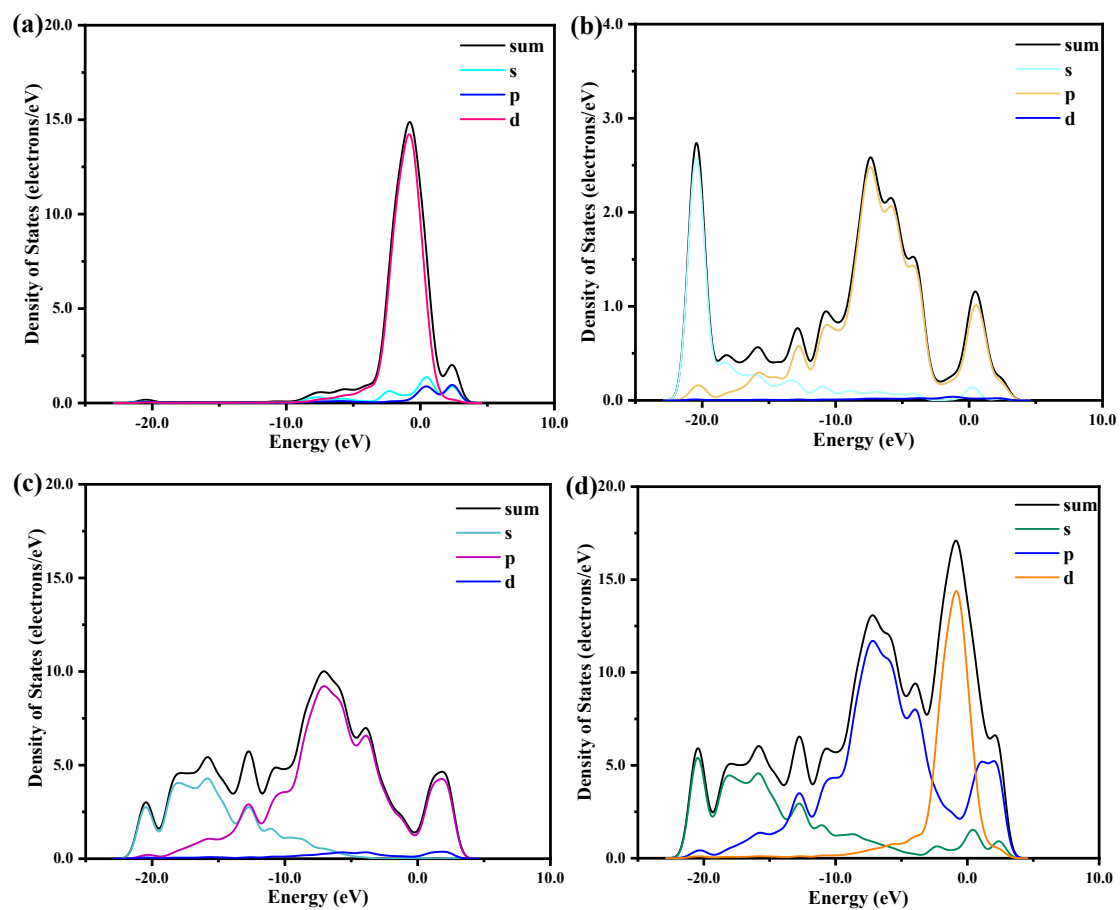

**Figure S7.** PDOS (partial density of state) of (a) Co atoms, (b) N atoms, (c) C atoms, and (d) the total DOS in Co42-NG.

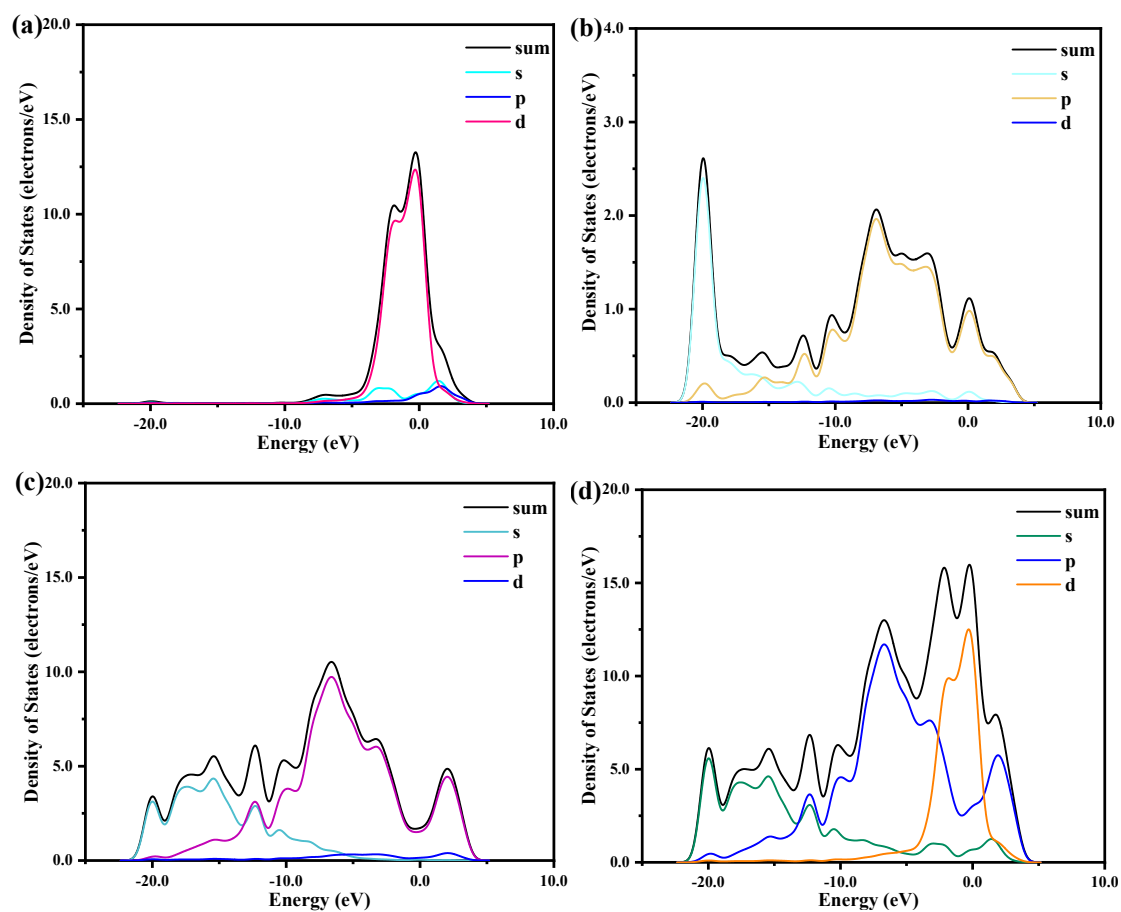

**Figure S8.** PDOS (partial density of state) of (a) Co atoms, (b) N atoms, (c) C atoms, and (d) the total DOS in Co43-NG.

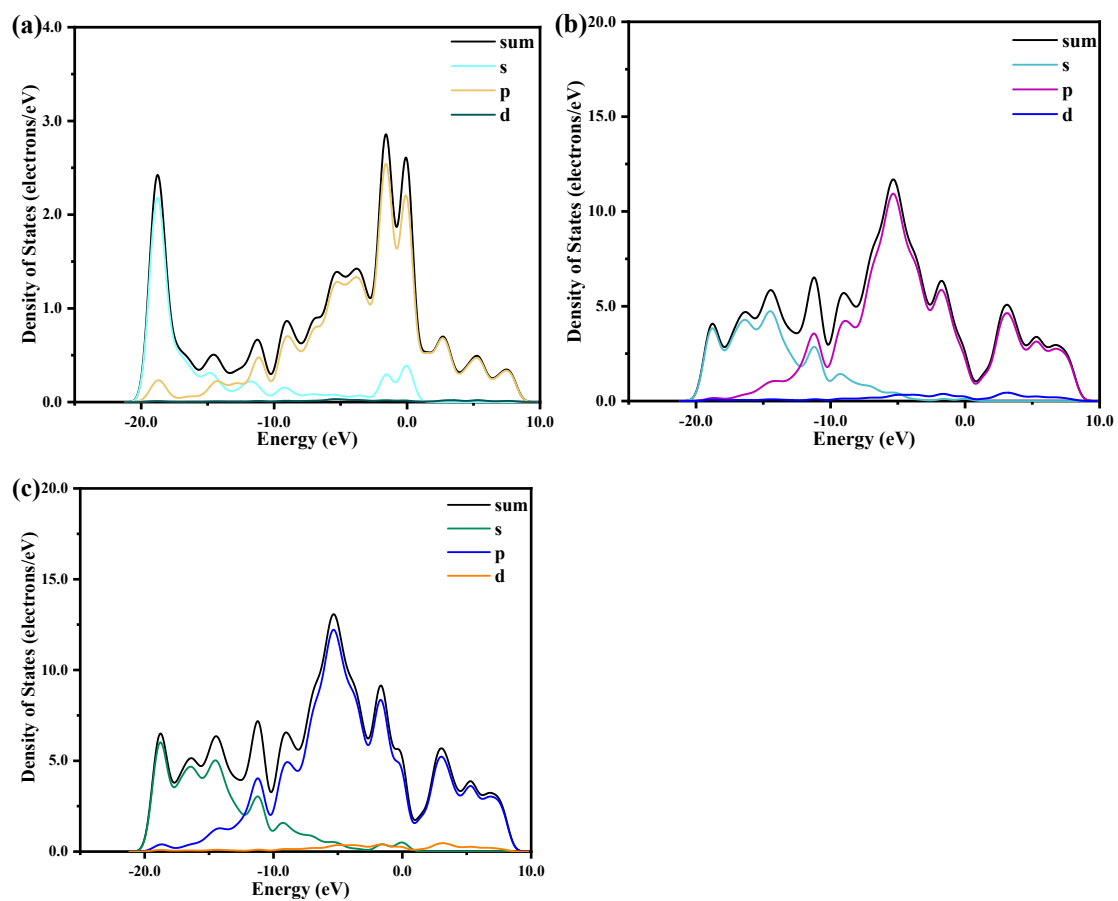

**Figure S9.** PDOS (partial density of state) of (a) N atoms, (b) C atoms, and (c) the total DOS in NG.

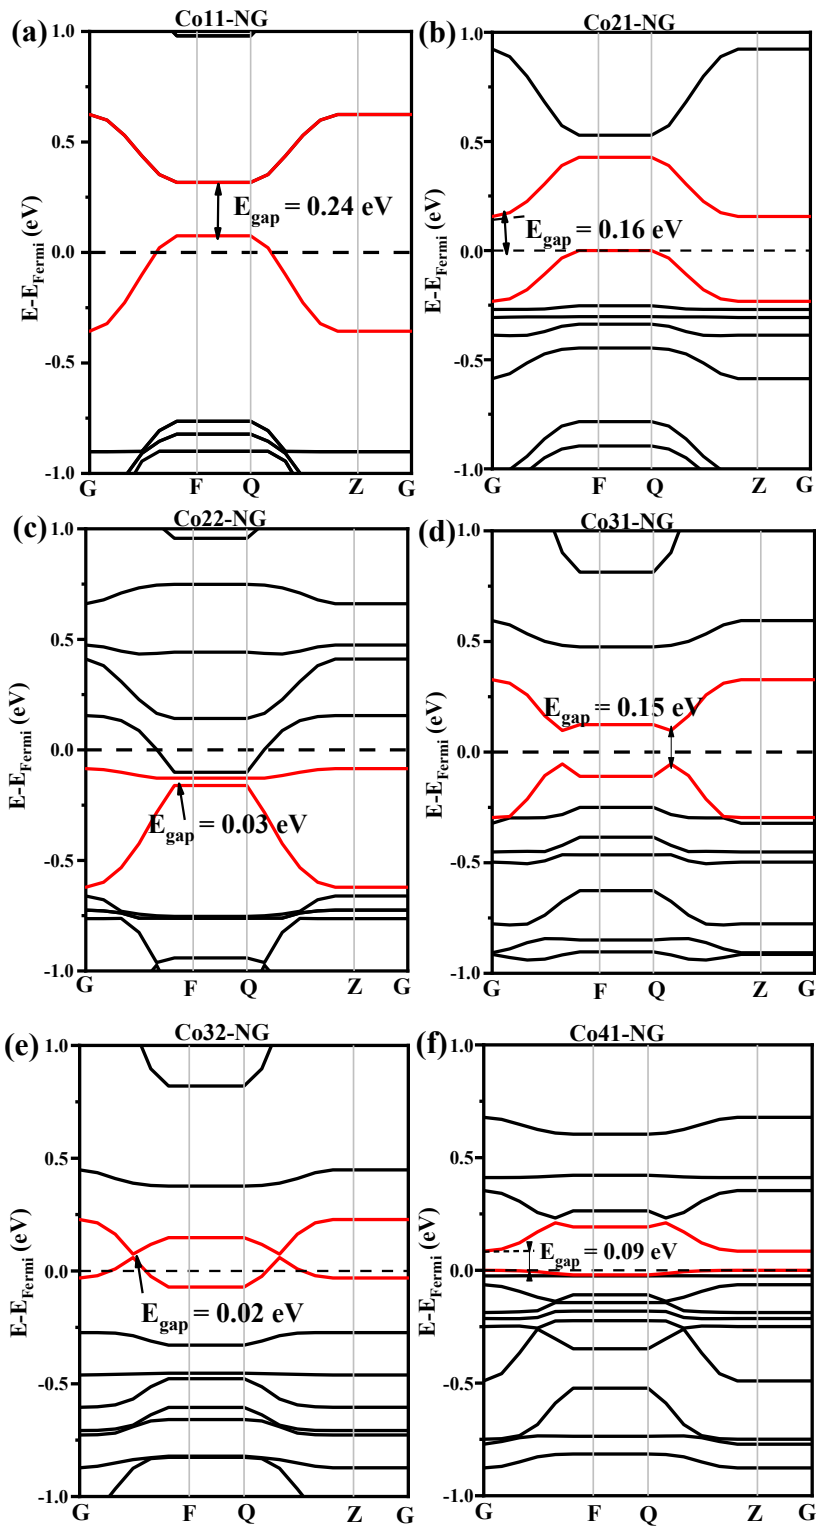

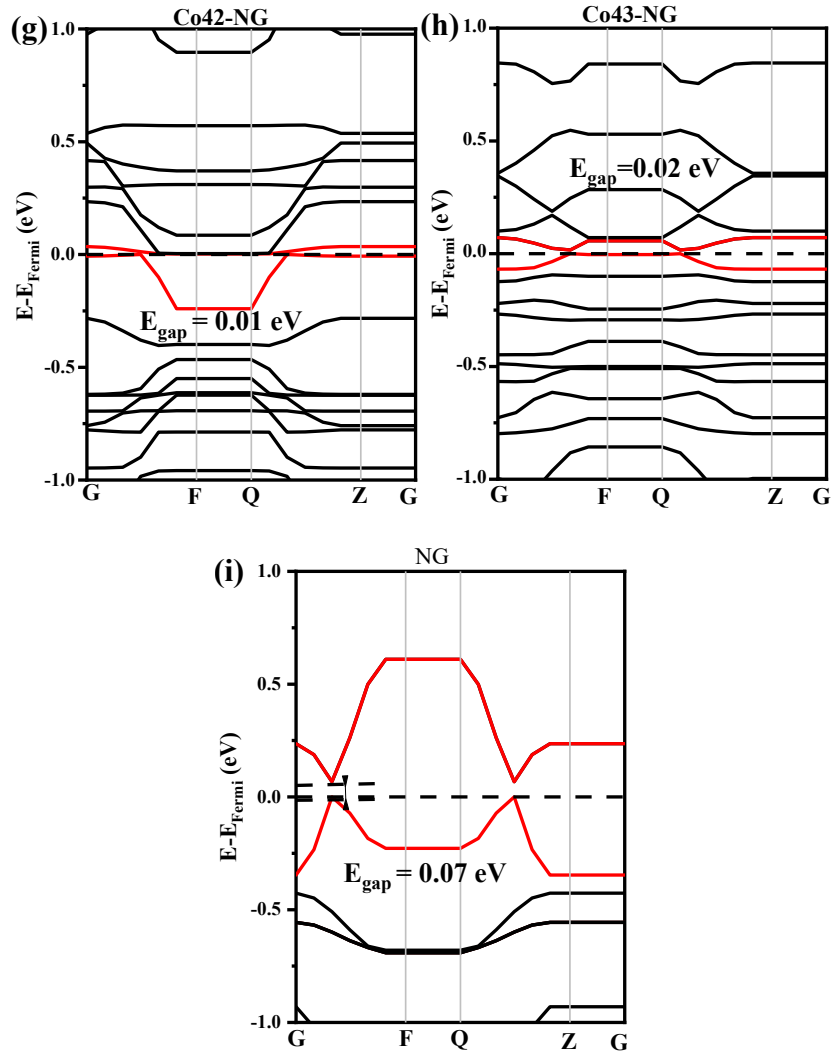

**Figure S10.** Energy band structure profile of (a) Co11-NG, (b) Co21-NG, (c) Co22-NG, (d) Co31-NG, (e) Co32-NG, (f) Co41-NG, (g) Co42-NG, (h) Co43-NG, and (i) NG.

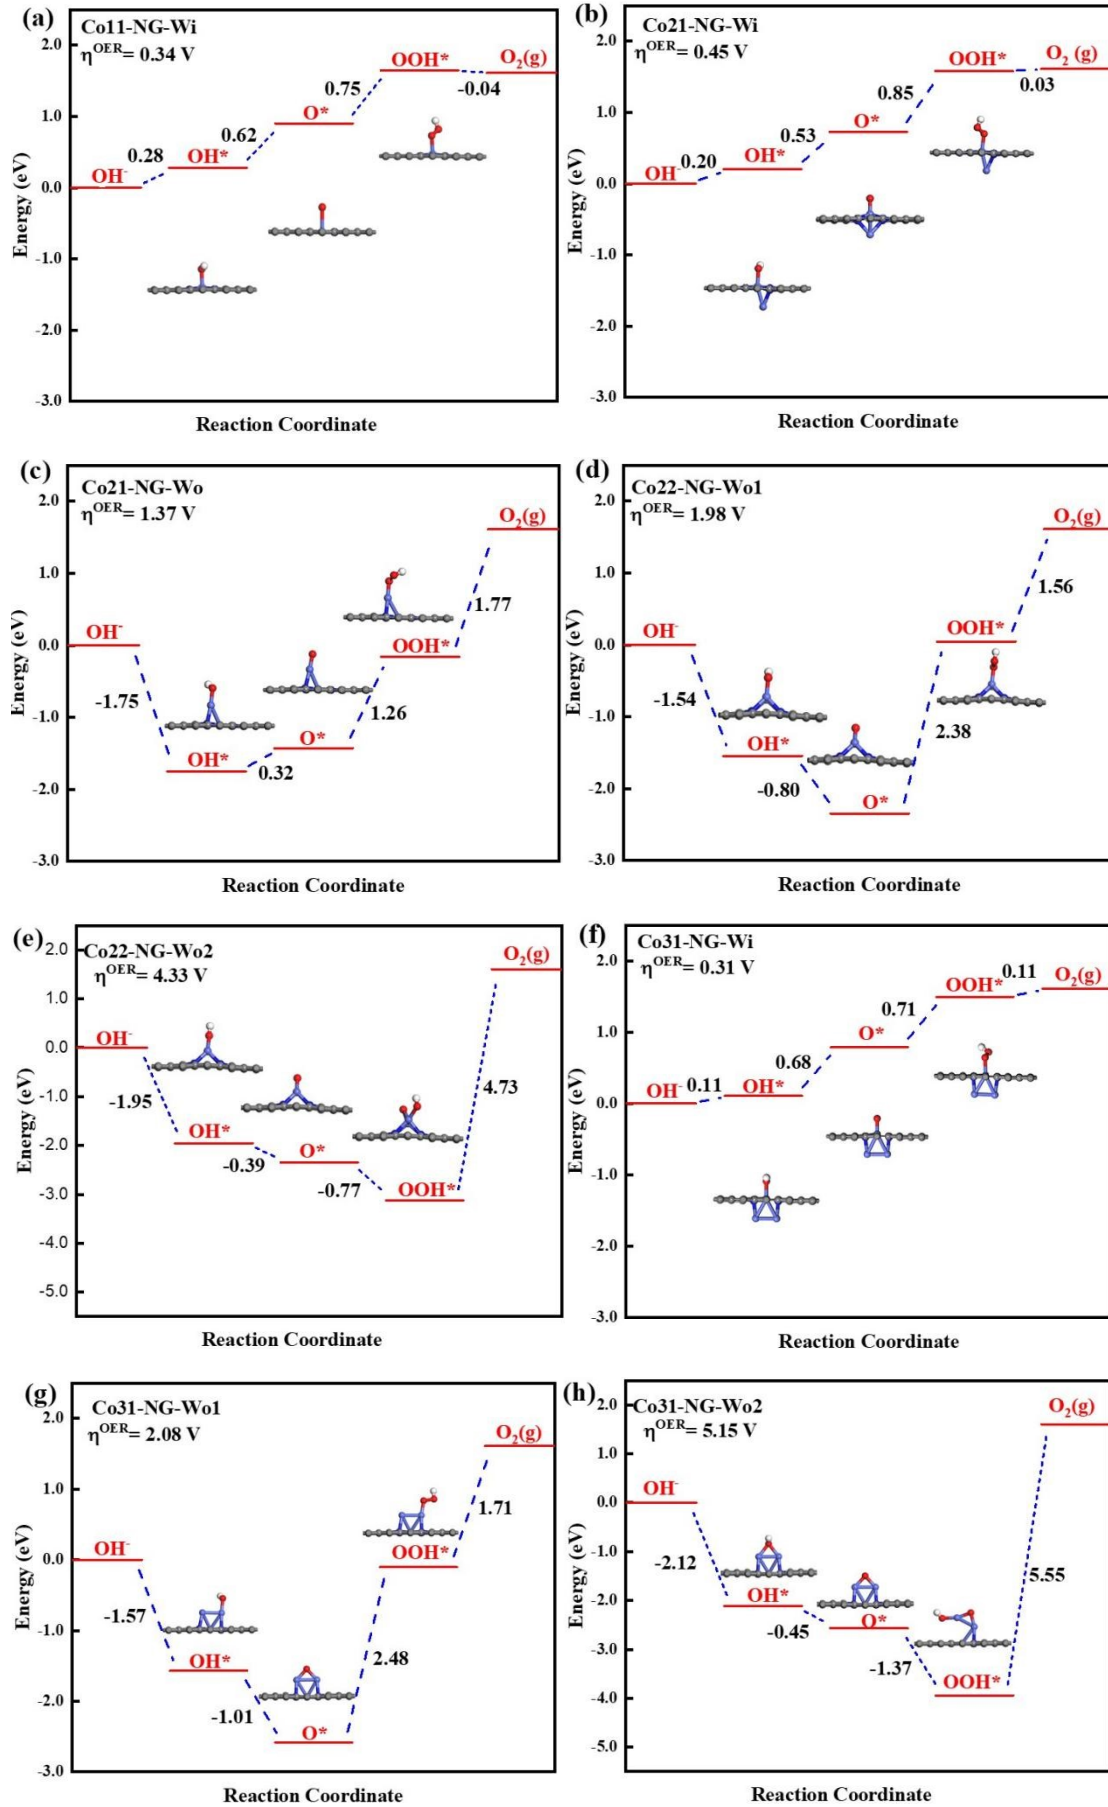

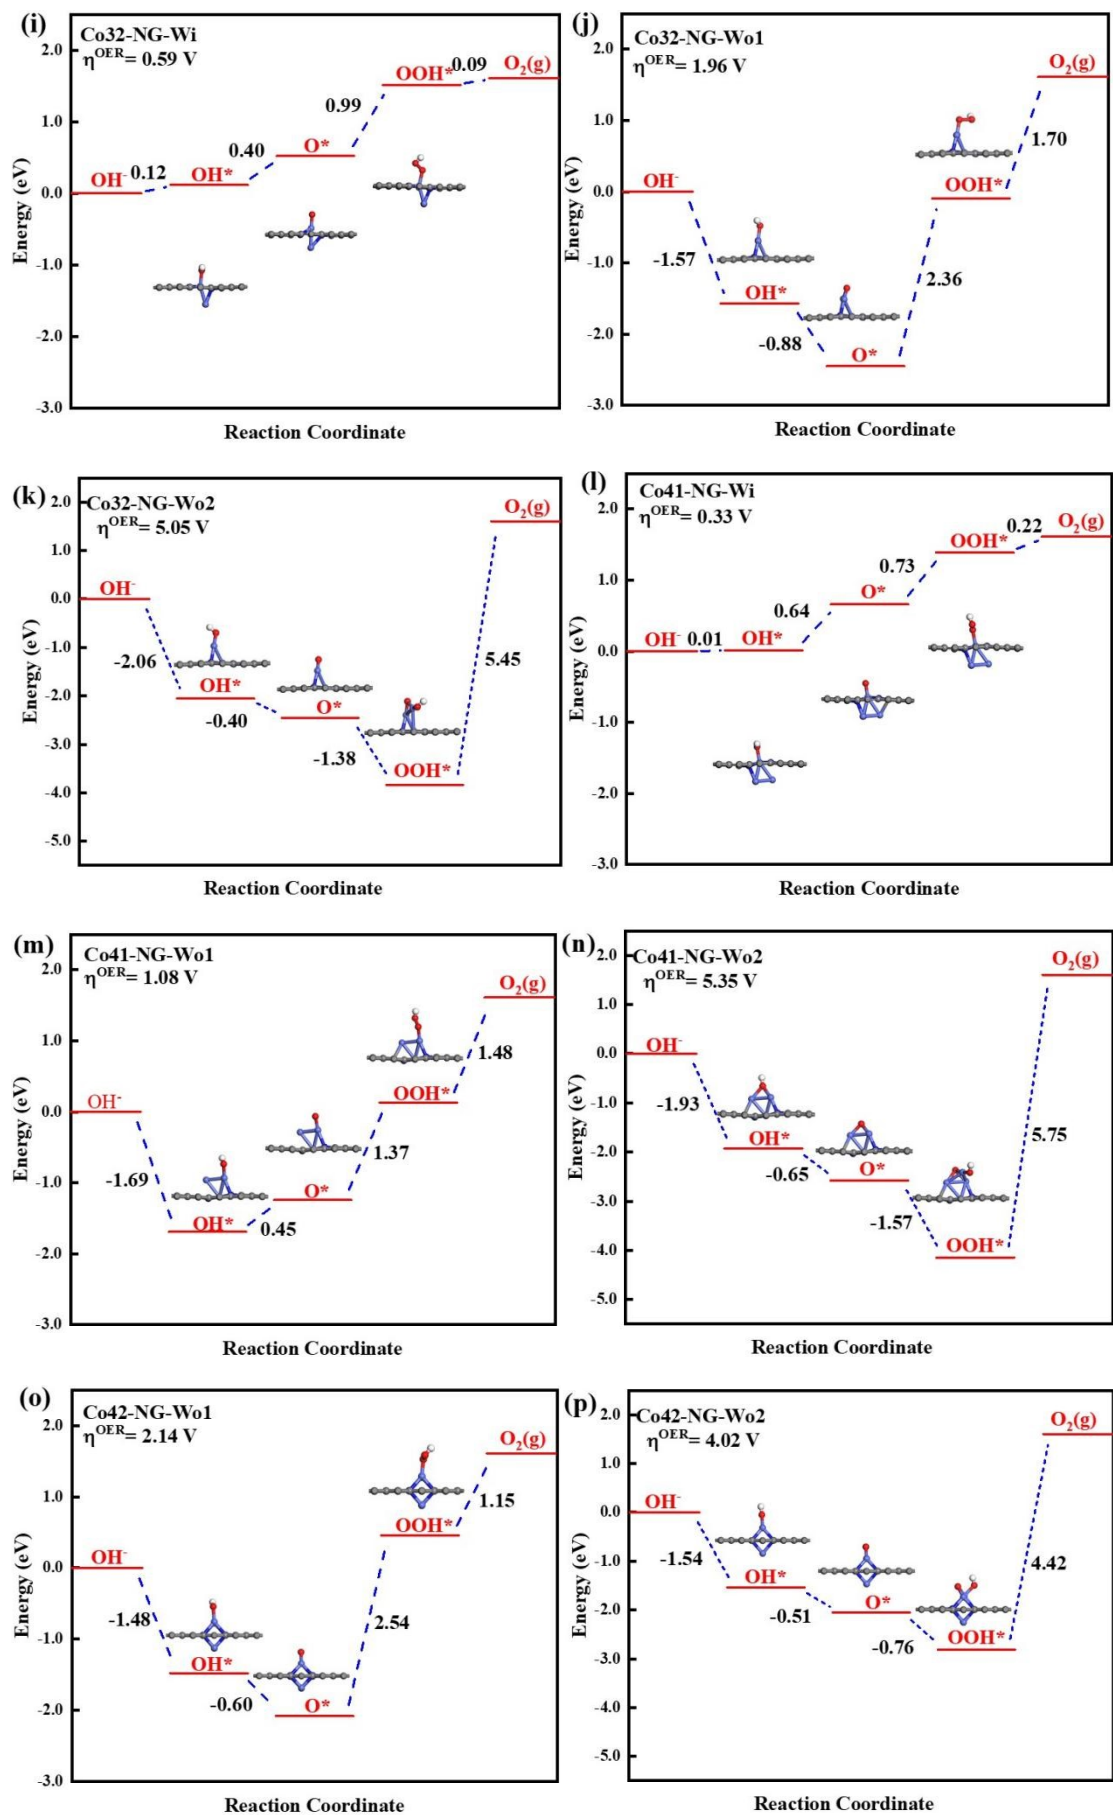

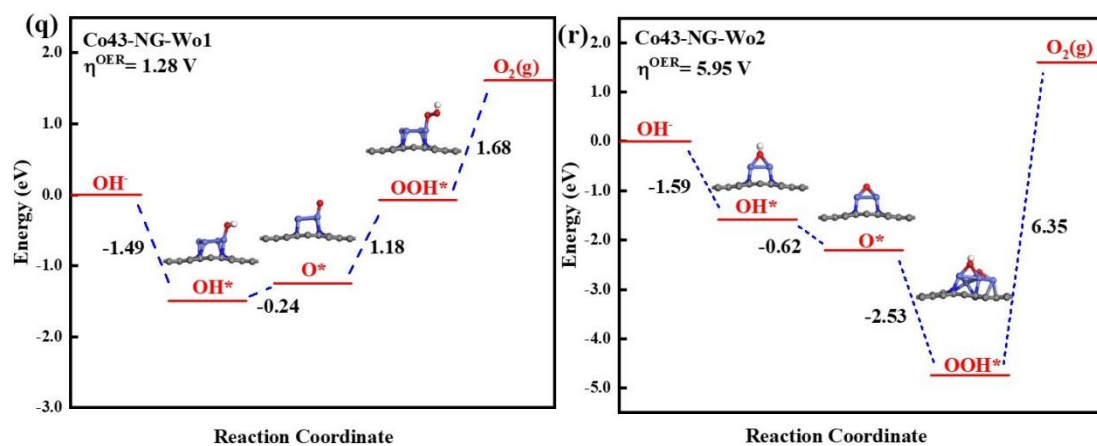

**Figure S11.** The computed free energy profiles and optimized intermediate structure for OER on Coxy-NG ( $x=1-4, y=1-3$ ).



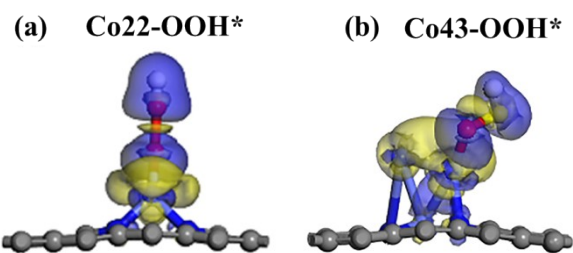

**Figure S12.** Charge differential density (CDD) of the rate determining step (RDS) of Co22-NG and Co43-NG.

**Table S1.** The Millikan charges (in e) for each Co atom and all N atoms (total charge) of Coxy-NG (x=1-4, y=1-3).

| Catalyst | Charge Population |                                                |        |
|----------|-------------------|------------------------------------------------|--------|
|          | In-plane Co       | Out-plane Co                                   | N      |
| Co11-NG  | 0.147             | \                                              | -1.426 |
| Co21-NG  | 0.161             | 0.134                                          | -1.498 |
| Co22-NG  | \                 | 0.052(Co1), 0.067(Co2)                         | -1.320 |
| Co31-NG  | 0.283             | 0.079(Co1), 0.078(Co2)                         | -1.562 |
| Co32-NG  | 0.273             | 0.069(Co1), 0.069(Co2)                         | -1.611 |
| Co41-NG  | 0.256             | 0.076(Co1), 0.121(Co2), 0.119(Co3)             | -1.617 |
| Co42-NG  | \                 | 0.124(Co1),0.124(Co2),0.124(Co3), 0.123(Co4)   | -1.836 |
| Co43-NG  | \                 | 0.051(Co1), 0.051(Co2), 0.052(Co3), 0.052(Co4) | -1.327 |

**Table S2.** The computed binding energies ( $E_b$ , eV), cohesive energies ( $E_c$ , eV), shortest distances between Co and N atoms ( $d_{\text{Co-N}}$ , Å), corresponding descriptor ( $\Delta G_{\text{OH}^*}$ ,  $\Delta G_{\text{O}^*}$ ,  $\Delta G_{\text{OOH}^*}$ , all in eV), the RDS barrier ( $E_{\text{RDS}}$ , eV), and overpotential ( $\eta^{\text{OER}}$ , V) for Coxy-NG (x=1-4; y=1-3).

| Catalyst     | $E_b$  | $E_c$ | $d_{\text{Co-N}}$ | $\Delta G_{\text{OH}^*}$ | $\Delta G_{\text{O}^*}$ | $\Delta G_{\text{OOH}^*}$ | $E_{\text{RDS}}$ | $\eta^{\text{OER}}$ |
|--------------|--------|-------|-------------------|--------------------------|-------------------------|---------------------------|------------------|---------------------|
| Co11-NG      | -11.25 | -7.67 | 1.90              | 0.28                     | 0.90                    | 1.65                      | 0.75             | 0.34                |
| Co21-NG(Wi)  | -13.17 | -7.49 | 2.03              | 0.20                     | 0.73                    | 1.58                      | 0.85             | 0.45                |
| Co21-NG(Wo)  | -13.17 | -7.49 | 2.03              | -1.75                    | -1.43                   | -0.16                     | 1.77             | 1.37                |
| Co22-NG(Wo1) | -11.32 | -7.43 | 1.88              | -1.54                    | -2.34                   | 0.04                      | 2.38             | 1.98                |
| Co22-NG(Wo2) |        |       |                   | -1.95                    | -2.35                   | -3.12                     | 4.73             | 4.33                |
| Co31-NG(wi)  | -16.13 | -7.35 | 1.90              | 0.11                     | 0.79                    | 1.50                      | 0.71             | 0.31                |
| Co31-NG(wo1) | -16.13 | -7.35 | 1.90              | -2.12                    | -2.59                   | 0.05                      | 2.64             | 2.24                |
| Co31-NG(wo2) |        |       |                   | -2.12                    | -2.57                   | -3.94                     | 5.55             | 5.15                |
| Co32-NG(wi)  | -16.10 | -7.36 | 2.02              | 0.12                     | 0.52                    | 1.52                      | 0.99             | 0.59                |
| Co32-NG(wo1) | -16.10 | -7.36 | 2.02              | -2.06                    | -2.47                   | -0.97                     | 2.58             | 2.18                |
| Co32-NG(wo2) |        |       |                   | -2.06                    | -2.46                   | -3.84                     | 5.45             | 5.05                |
| Co41-NG(wi)  | -19.78 | -7.25 | 2.15              | 0.01                     | 0.66                    | 1.39                      | 0.73             | 0.33                |
| Co41-NG(wo1) | -19.78 | -7.25 | 2.15              | -1.29                    | -0.73                   | 0.28                      | 1.33             | 0.93                |
| Co41-NG(wo2) |        |       |                   | -1.93                    | -2.58                   | -4.14                     | 5.75             | 5.35                |
| Co42-NG(Wo1) | -17.40 | -7.18 | 2.02              | -1.48                    | -2.08                   | 0.46                      | 2.54             | 2.14                |
| Co42-NG(Wo2) |        |       |                   | -1.54                    | -2.05                   | -2.81                     | 4.42             | 4.02                |
| Co43-NG(Wo1) | -16.48 | -7.15 | 1.91              | -1.49                    | -1.25                   | -0.07                     | 1.68             | 1.28                |
| Co43-NG(Wo2) |        |       |                   | -1.59                    | -2.21                   | -4.74                     | 6.35             | 5.95                |
